# Supplementary material for: Photocatalytic Degradation, Anticancer, and Antibacterial Studies of Lysinibacillus sphaericus Biosynthesized Hybrid Metal/Semiconductor Nanocomposites
Source: MDPI journal article supplement (doi:10.3390/microorganisms11071810), 2023-07-14
Supplement: s1 [file s1]

## Supplementary Materials

# Photocatalytic Degradation, Anticancer, and Antibacterial Studies of *Lysinibacillus sphaericus* Biosynthesized Hybrid Metal/Semiconductor Nanocomposites

Kannan Badri Narayanan <sup>1,2,\*</sup>, Rakesh Bhaskar <sup>1</sup>, Yong Joo Seok <sup>1</sup> and Sung Soo Han <sup>1,2,\*</sup>

<sup>1</sup> School of Chemical Engineering, Yeungnam University, 280 Daehak-Ro, Gyeongsan 38541, Gyeongbuk, Republic of Korea; indiaxenobiotics@gmail.com (R.B.); badri.explore@gmail.com (Y.J.S.)

<sup>2</sup> Research Institute of Cell Culture, Yeungnam University, 280 Daehak-Ro, Gyeongsan 38541, Gyeongbuk, Republic of Korea

✉ Correspondence: okbadri@gmail.com or okbadri@yu.ac.kr (K.B.N.); sshan@yu.ac.kr (S.S.H.)

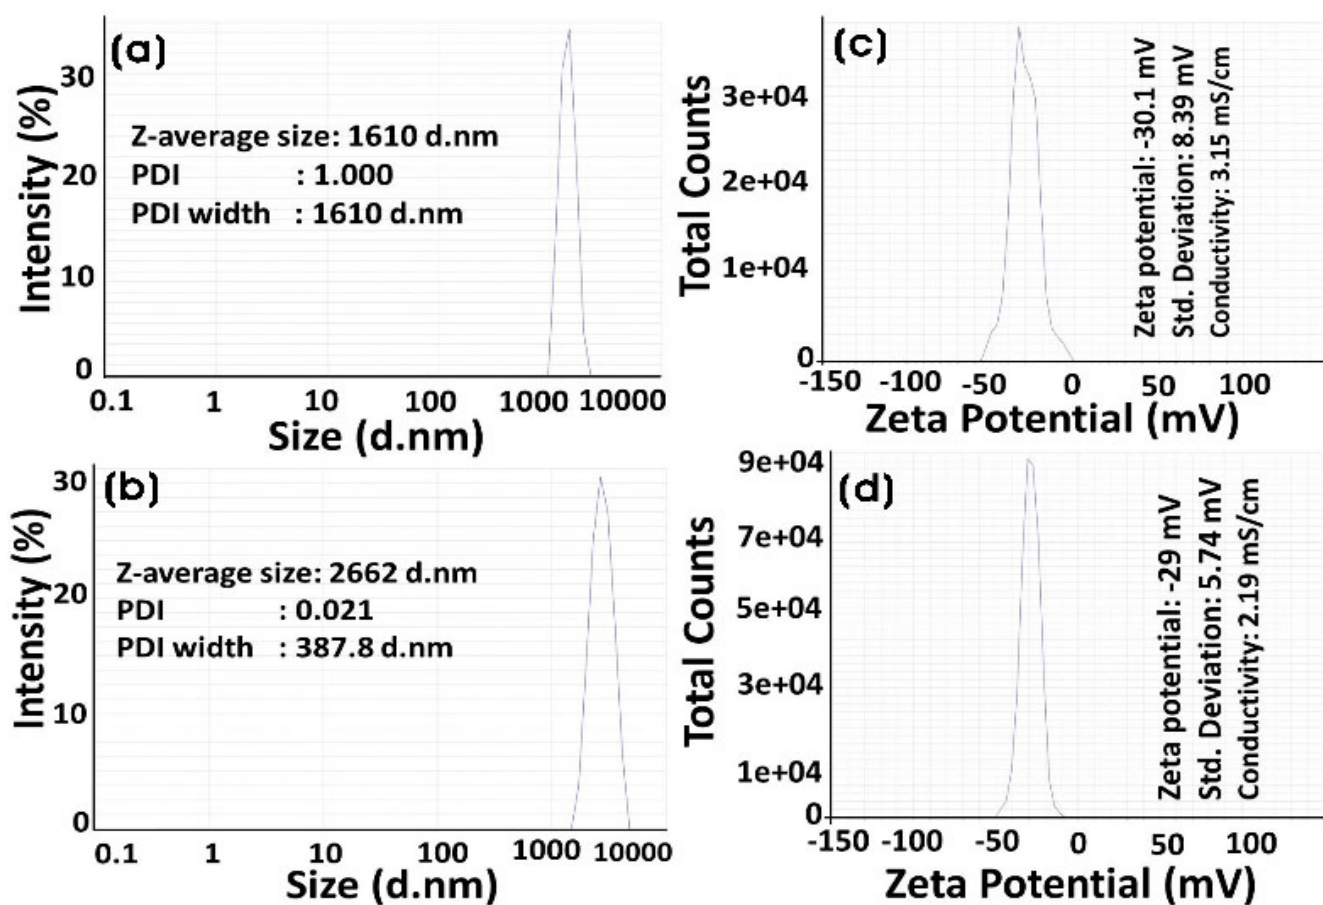

**Supplementary Figure S1.** (a, b) Dynamic light scattering (DLS) and (c, d) zeta ( $\zeta$ ) potentials of biosynthesized ZnO and Ag/ZnO NCs.

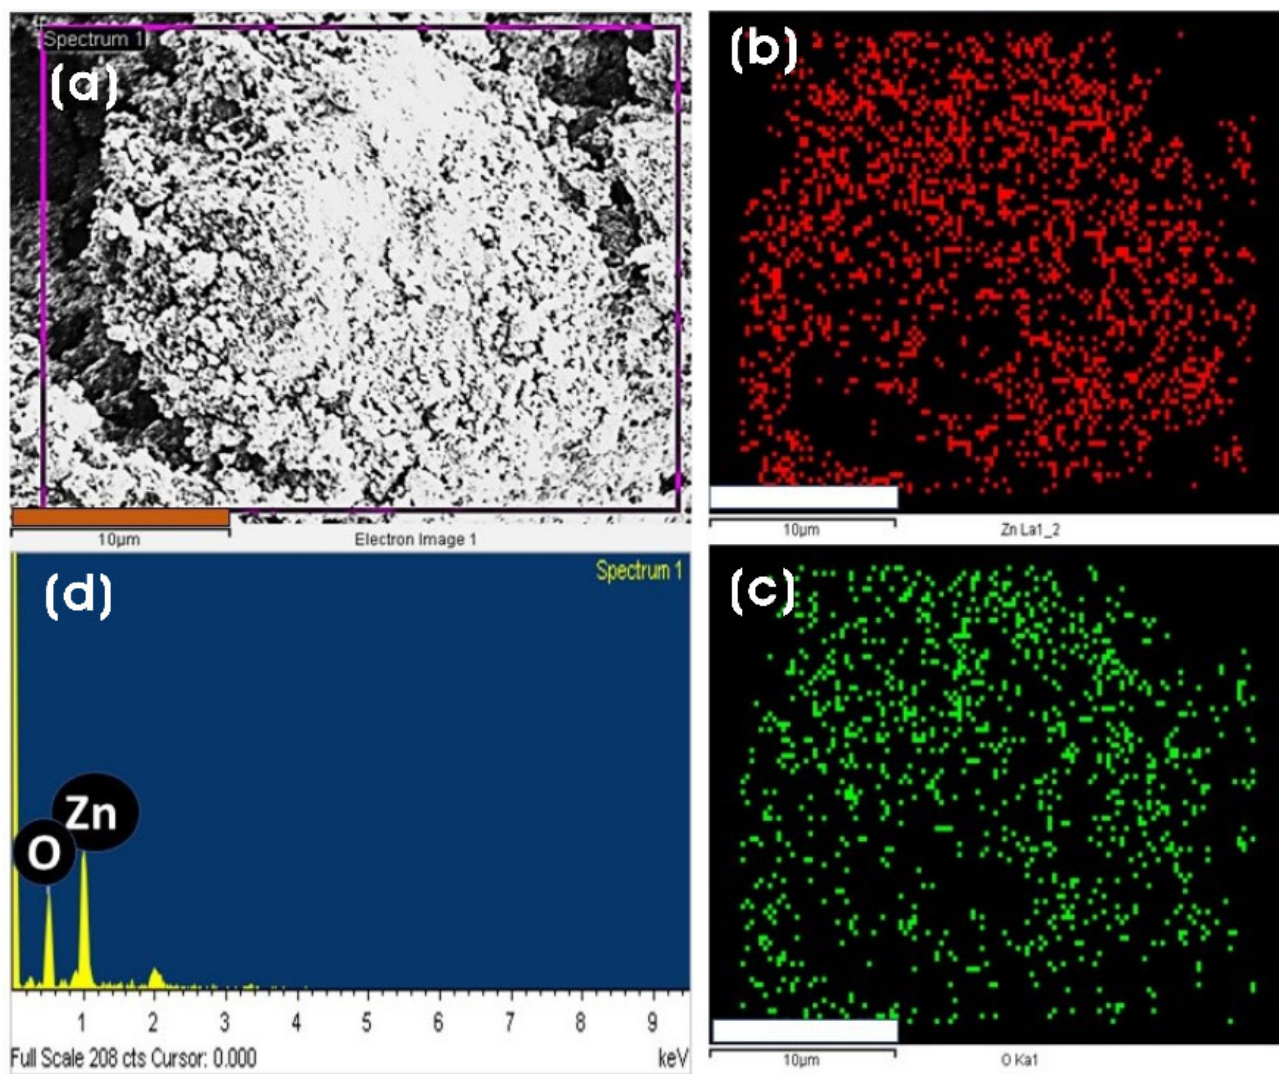

**Supplementary Figure S2.** FE-SEM-EDX analysis of ZnO. (a) FE-SEM micrograph and elemental maps of (b) Zn-L (c) O-K and (d) EDX spectrum.

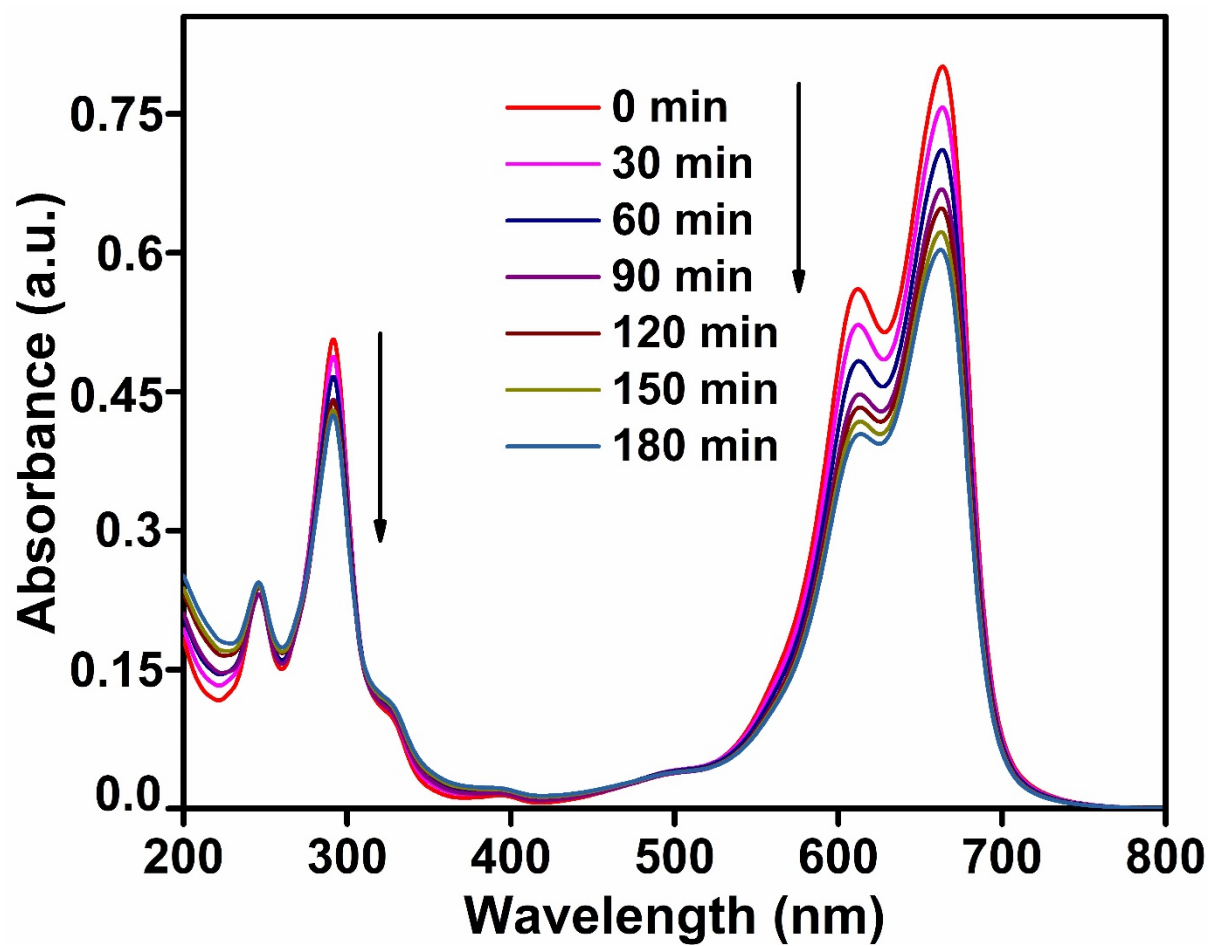

Supplementary Figure S3. Photolysis of methylene blue dye without any photocatalysts.

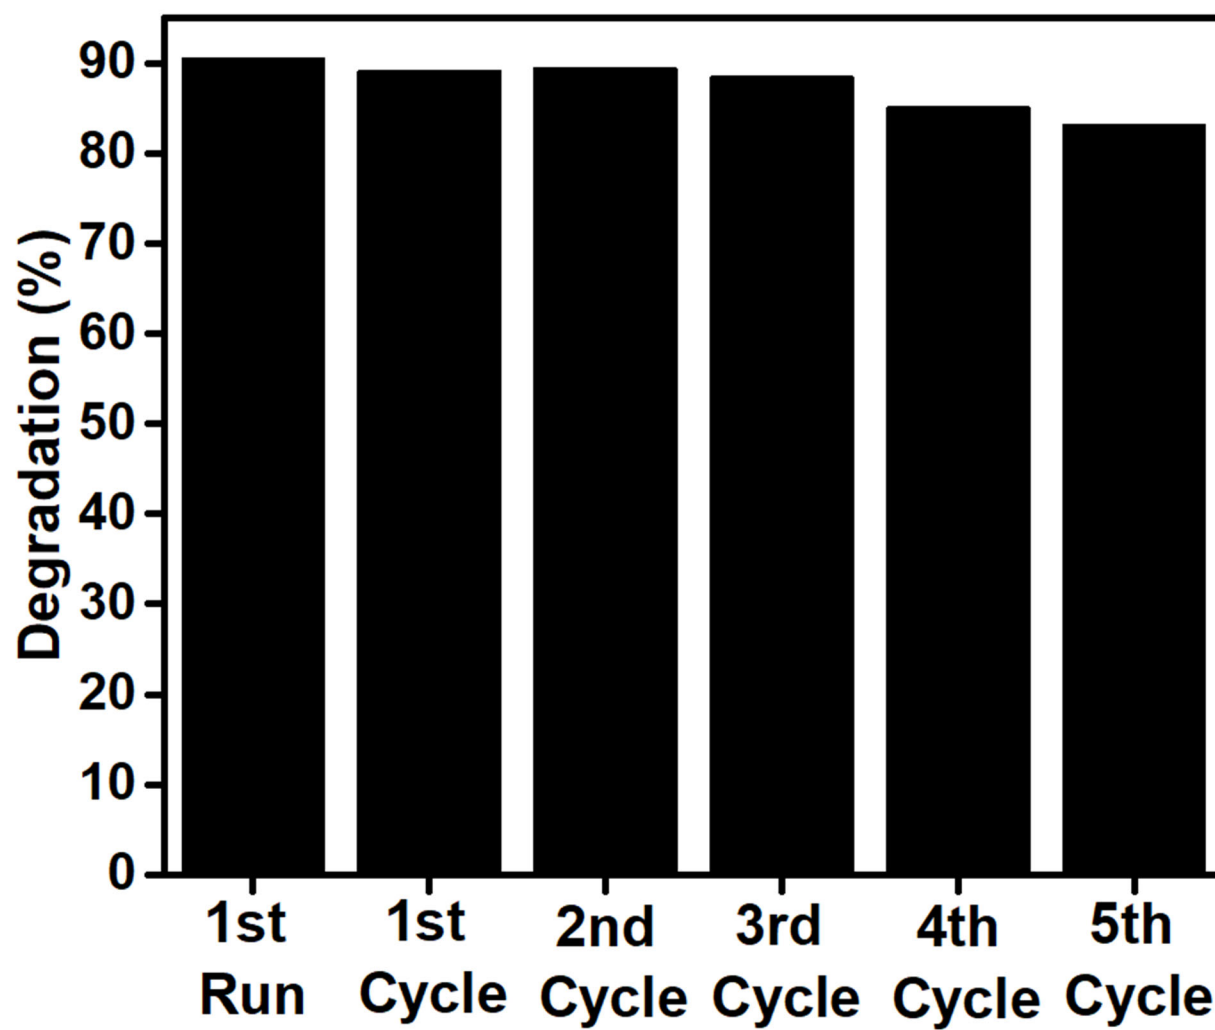

**Supplementary Figure S4.** Reusability of Ag/ZnO NC as a photocatalyst in the degradation of MB up to five cycles.
